# Supplementary material for: Enhancing geophysical flow machine learning performance via scale separation
Source: Copernicus journal article supplement (doi:10.5194/npg-28-423-2021), 2021-09-10
Supplement: Supplementary file 1 [file npg-28-423-2021-supplement.zip]

Archive with 3 entries (3 files):
- npg-28-423-2021-supplement-title-page.pdf
- SupVideo1.gif
- SupVideo2.gif
