# Supplementary material for: Enhancing geophysical flow machine learning performance via scale separation
Source: Copernicus journal article supplement (doi:10.5194/npg-28-423-2021), 2021-09-10
Supplement: Supplementary file 1 [file npg-28-423-2021-supplement.zip › npg-28-423-2021-supplement-title-page.pdf]

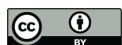

*Supplement of*

## **Enhancing geophysical flow machine learning performance via scale separation**

**Davide Faranda et al.**

*Correspondence to:* Davide Faranda ([davide.faranda@lsce.ipsl.fr](mailto:davide.faranda@lsce.ipsl.fr))

- [npg-28-423-2021-supplement-title-page.pdf](#)
- [SupVideo1.gif](#)
- [SupVideo2.gif](#)

The copyright of individual parts of the supplement might differ from the article licence.
