# Supplementary figures and images for: Enhancing geophysical flow machine learning performance via scale separation
Source: Copernicus journal article supplement (doi:10.5194/npg-28-423-2021), 2021-09-10

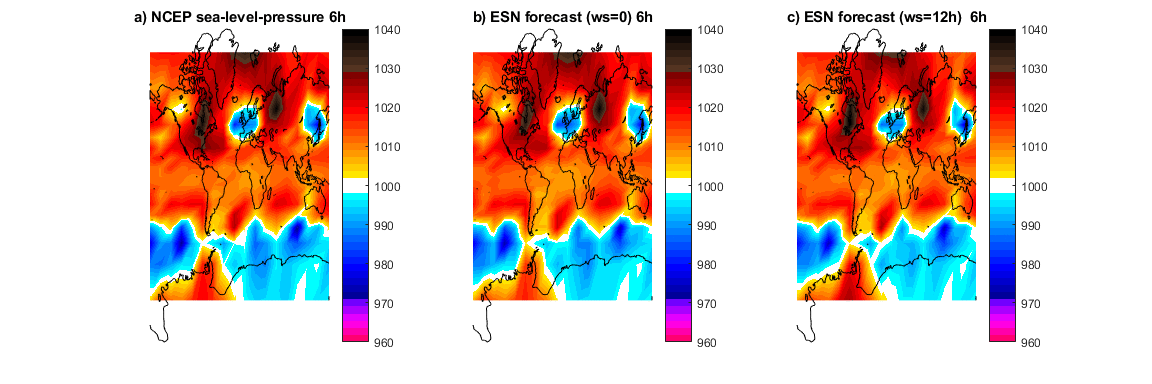

Supplement: Supplementary file 1 [file npg-28-423-2021-supplement.zip › SupVideo1.gif]

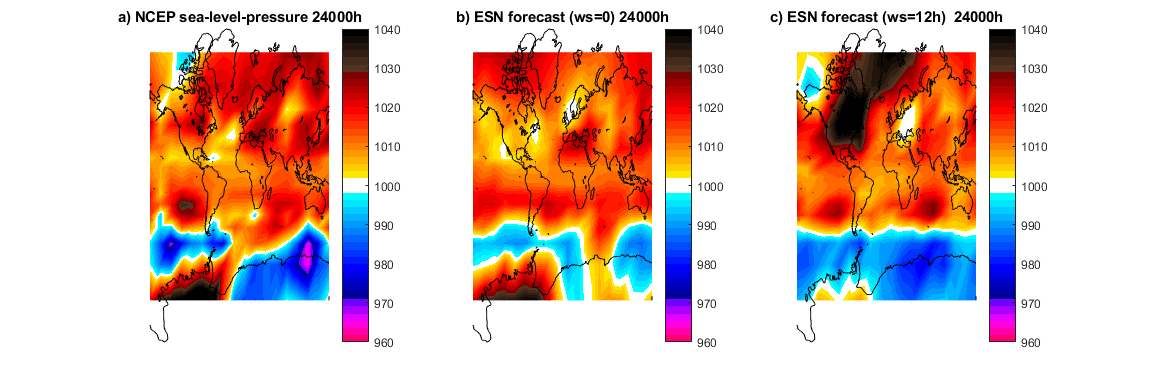

Supplement: Supplementary file 1 [file npg-28-423-2021-supplement.zip › SupVideo2.gif]
